# Supplementary material
Source: PubMed Central journal article supplement (PMC4457156)
Supplement: supp_128.10.1901_JCS161703.pdf [file supp_128.10.1901_JCS161703.pdf]

**Figure S1**

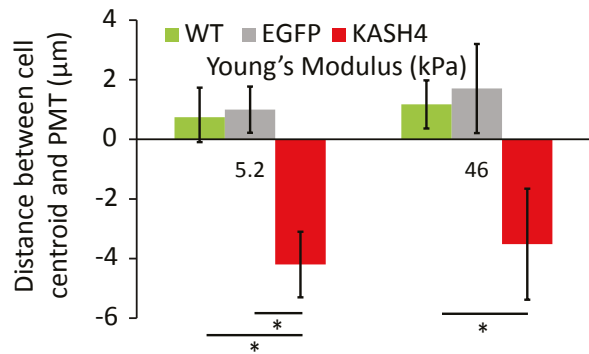

**Figure S1.** Average distance between the cell centroid and the PMT for wildtype (WT), EGFP and KASH4 cells. In control cells, the PMT lies slightly behind the cell centroid, while it lies in front of the cell centroid in KASH4 cells. The trend is independent of substrate rigidity. Error bars represent SEM.  $N \geq 20$  for each condition. \*,  $P < 0.05$ .

**Figure S2**

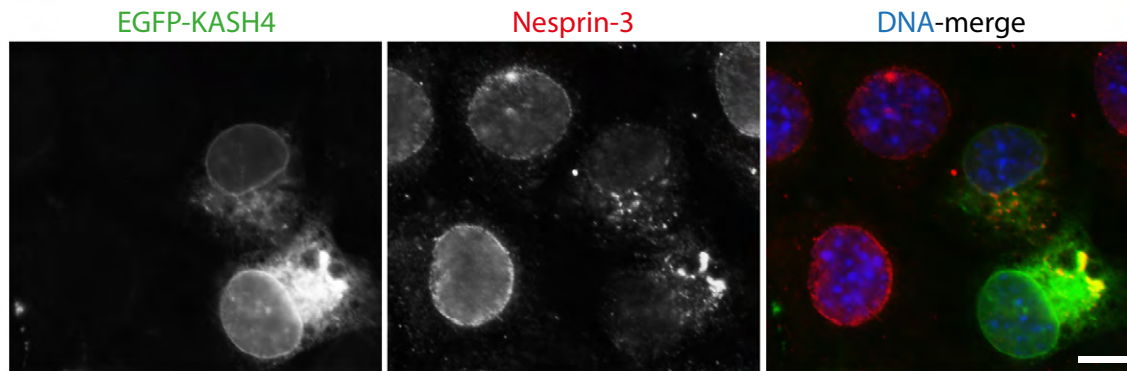

**Figure S2.** EGFP-KASH4 displaces endogenous nesprin 3 from the nuclear envelope. NIH3T3 cells transiently transfected with EGFP-KASH4 (green) exhibit a loss of endogenous nesprin 3 (red) from the nuclear envelope. DNA is labeled with Hoechst (blue) in the merged image. Scale bar is  $10 \mu\text{m}$ .

**Figure S3**

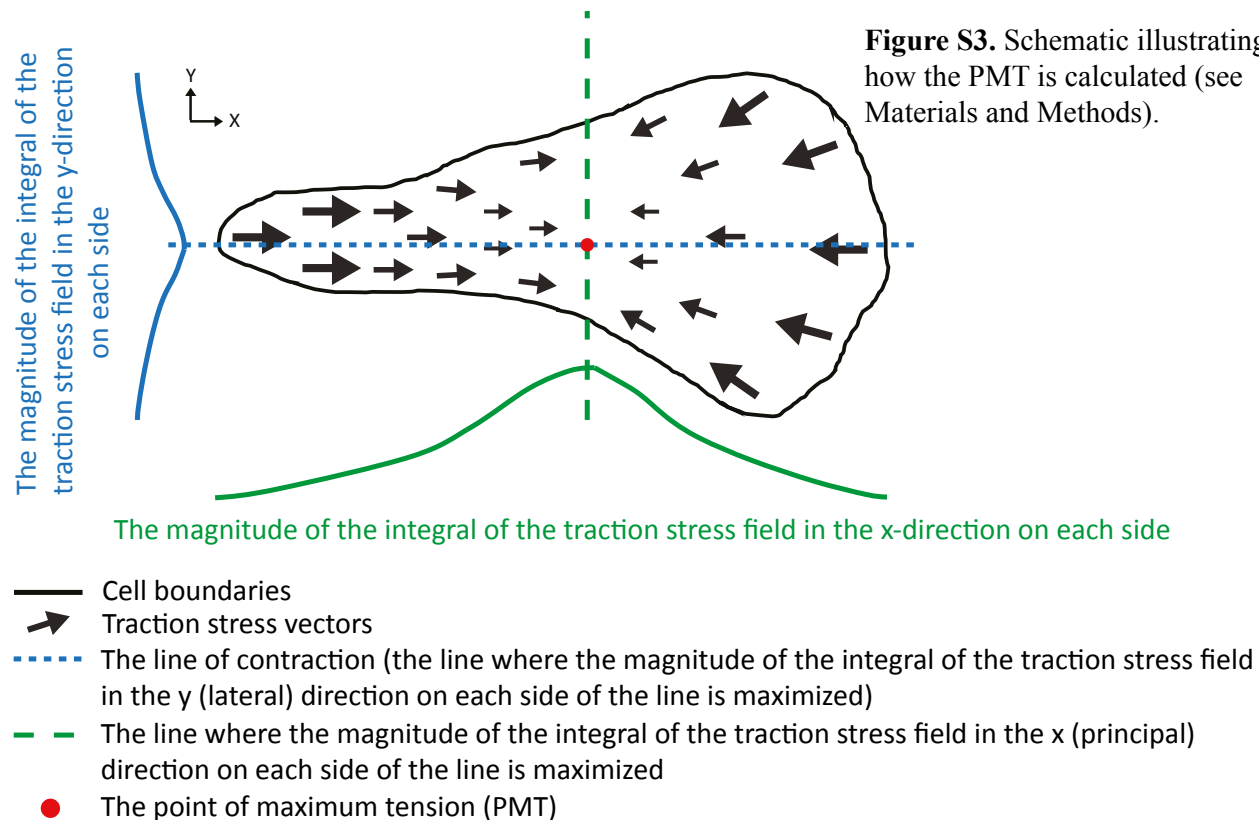

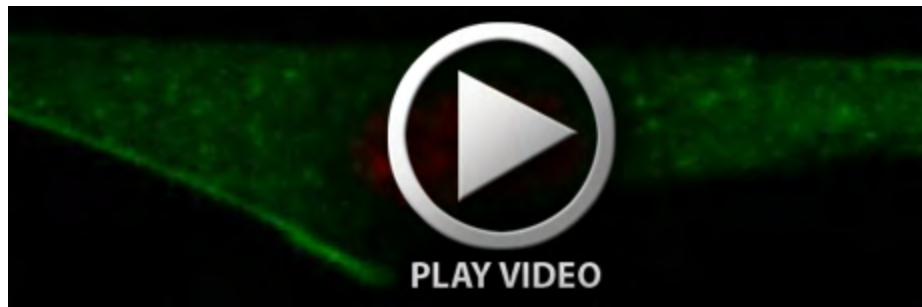

**MovieS1.** Z-stack of the migrating cell in Figure 2C, top (displaying a lateral stress fiber that does not appear to touch the nucleus), before severing the lateral stress fiber, showing no other visible actin bundles in other confocal planes. Frames show the nucleus (red) and actin (green) at  $0.3\ \mu\text{m}$  stepsize.

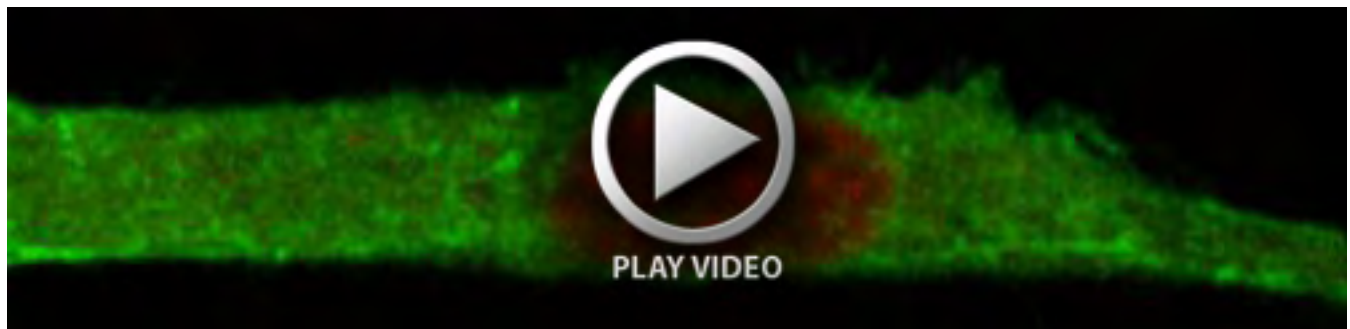

**MovieS2.** Z-stack of the migrating cell in Figure 2C, bottom (displaying a lateral stress fiber that appears to touch the nucleus), before severing the lateral stress fiber, showing no other visible actin bundles in other confocal planes. Frames show the nucleus (red) and actin (green) at  $0.3\ \mu\text{m}$  stepsize.
